# Supplementary material
Source: Springer Nature journal article supplement (https://www.springermedizin.de/resource/supplementary/12906_2012_1251_MOESM1_ESM.pdf/9520040)
Supplement: MOESM1 [file 9520040]

# Daily administration of test drugs

7 weeks old

9 weeks old

14 weeks old

Day 0

Day 14

Day 49

Biochemical and  
Histochemical  
analyses

ORT

MYT

WMT

EPMT

Blood sampling

Behavioral experiments

Blood sampling
